# Supplementary material
Source: PubMed Central journal article supplement (PMC2675032)

Supplementary Figure 1

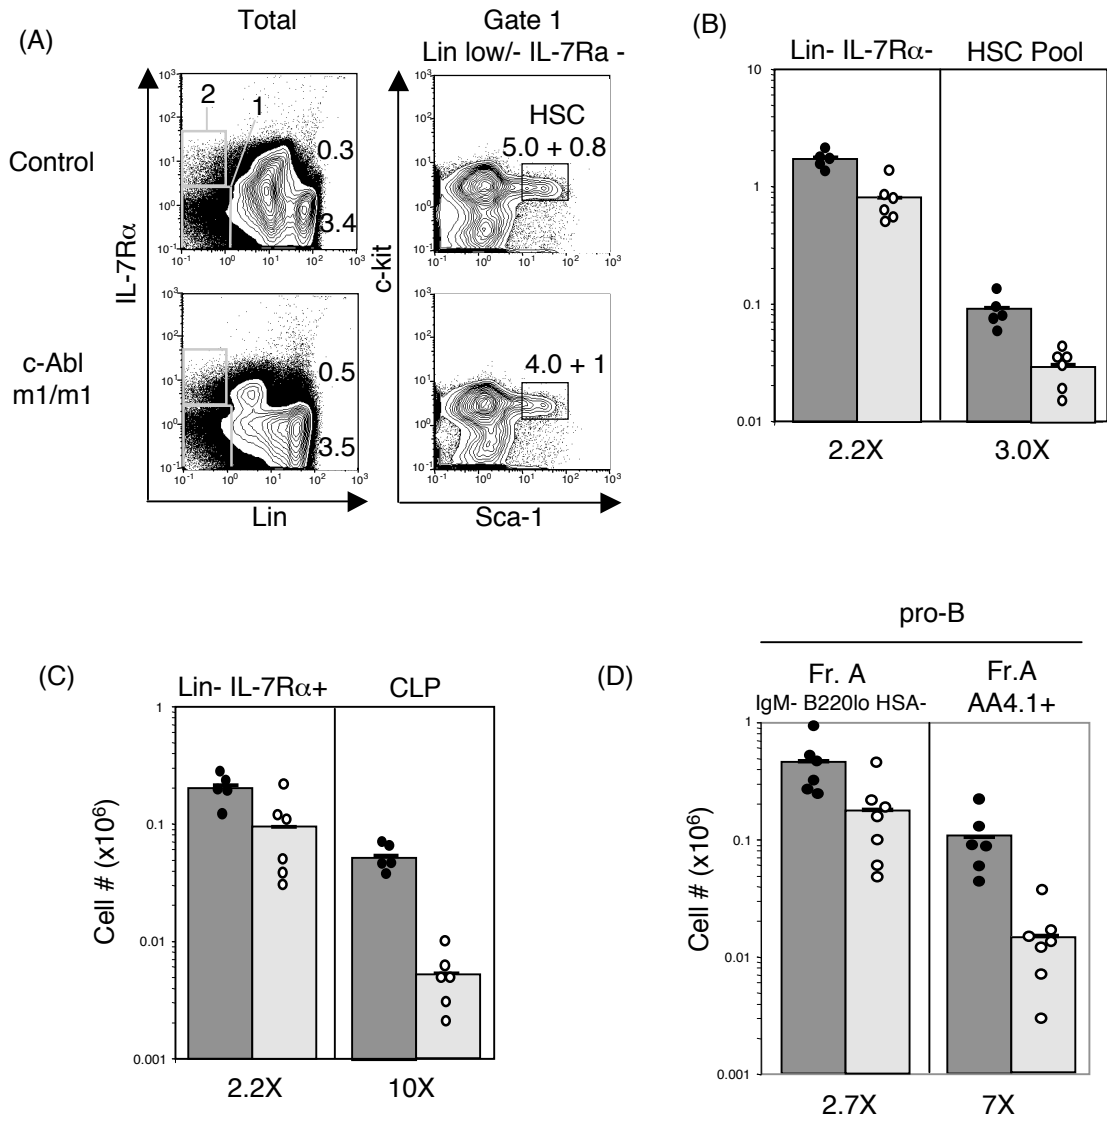

Supplementary Figure 2

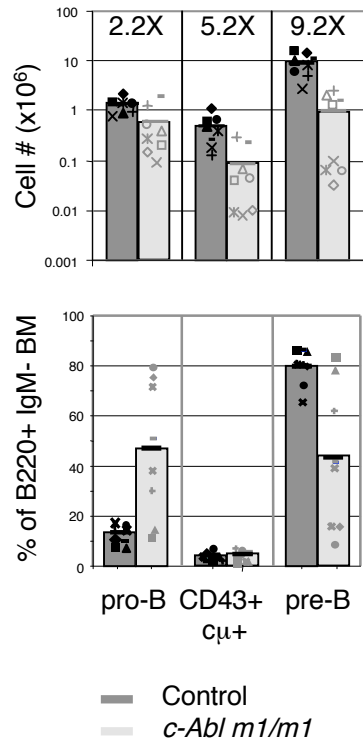

Supplementary Figure 3

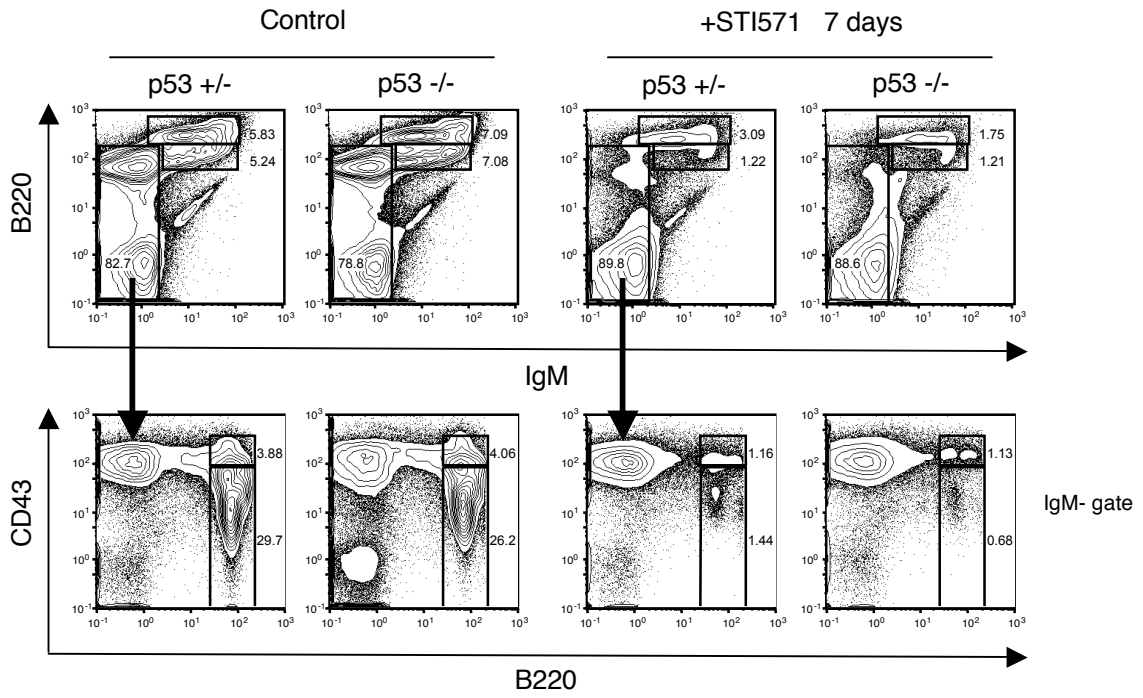

Supplement: dxp027_1.pdf [file dxp027_1.pdf]
